1 A User-Friendly Guide to Using Distance Measures to Compare  
2 Time Series in Ecology

3

4 Shawn Dove<sup>\*1,2</sup>, Monika Böhm<sup>2,3</sup>, Robin Freeman<sup>2</sup>, Sean Jellesmark<sup>1,2</sup>, and David  
5 Murrell<sup>1</sup>

6

7 <sup>1</sup>Centre for Biodiversity and Environment Research, University College London,  
8 Gower Street, London WC1E 6BT, UK.

9 <sup>2</sup>Institute of Zoology, Zoological Society of London, Wellcome Building, Outer Cir,  
10 London NW8 7LS, UK.

11 <sup>3</sup>Global Center for Species Survival, Indianapolis Zoo, 1200 West Washington Street,  
12 Indianapolis, IN 46222, USA

13

14 \*Corresponding author. Email: [s.dove@ucl.ac.uk](mailto:s.dove@ucl.ac.uk)

## 15 **Abstract**

16 1. Time series are a critical component of ecological analysis, used to track changes in  
17 biotic and abiotic variables. Information can be extracted from the properties of time  
18 series for tasks such as classification, clustering, prediction, and anomaly detection.  
19 These common tasks in ecological research rely on the notion of (dis-) similarity  
20 which can be determined by using distance measures. A plethora of distance  
21 measures have been described in the scientific literature, but many of them have not  
22 been introduced to ecologists. Furthermore, little is known about how to select  
23 appropriate distance measures and the properties they focus on for time-series  
24 related tasks.

25 2. Here we describe 16 potentially desirable properties of distance measures, test 42  
26 distance measures for each property, and present an objective method to select  
27 appropriate distance measures for any task and ecological dataset. We then  
28 demonstrate our selection method by applying it to a set of real-world data on  
29 breeding bird populations in the UK. We also discuss ways to overcome some of the  
30 difficulties involved in using distance measures to compare time series.

31 3. Our real-world population trends exhibit a common challenge for time series  
32 comparison: a high level of stochasticity. We demonstrate two different ways of  
33 overcoming this challenge, first by selecting distance measures with properties that  
34 make them well-suited to comparing noisy time series, and second by applying a  
35 smoothing algorithm before selecting appropriate distance measures. In both cases,  
36 the distance measures chosen through our selection method are not only fit-for-  
37 purpose but are consistent in their rankings of the population trends.

38 4. The results of our study should lead to an improved understanding of, and greater  
39 scope for, the use of distance measures for comparing time series within ecology, and  
40 allow for the answering of new ecological questions.

41

## 42 **Keywords**

43 dissimilarity measures, choosing distance measures, time series comparison, time  
44 series analysis, clustering, classification, similarity measures, distance measure  
45 selection

## 46 **1. Introduction**

47 Time series are a critical component of ecological analysis: ecologists use time series  
48 to track changes in biotic variables, such as population sizes and mean growth rates  
49 of individuals, as well as abiotic variables, such as temperature and atmospheric  
50 carbon dioxide. Time series provide insight into food web and ecosystem function  
51 and the causes and effects of environmental change, and are vital to any scientific  
52 approach to environmental management (Boero *et al.*, 2015). Time series datasets  
53 may contain thousands or even millions of time series (e.g., The Living Planet Index  
54 – WWF, 2020; BioTIME - Dornelas *et al.*, 2018; the North American Breeding Bird  
55 Survey - Pardieck *et al.*, 2019; the British Trust for Ornithology Breeding Bird Survey  
56 - Harris *et al.*, 2020; and the Continuous Plankton Recorder Survey - Edwards *et al.*,  
57 2012). Ecologists make inferences through time series comparisons. For example,  
58 one might look for similarities or differences in climate change response between  
59 populations within or across geographic or taxonomic groups. However, examining  
60 and analysing each time series by hand is unwieldy.

61 Data mining of time series is the process of extracting information from the  
62 properties of time series for tasks such as classification, clustering, prediction, and  
63 anomaly detection (Esling and Agon, 2012). These tasks are common in ecology, e.g.,  
64 clustering time series of parasite counts to identify infection patterns (Marques *et al.*,  
65 2018); predicting the emergence of fruiting bodies by classifying time series of  
66 environmental drivers (Capinha, 2019); identifying insect species by classifying  
67 wingbeat frequency signals (Potamitis *et al.*, 2015); surveying bird population sizes  
68 by classifying recorded calls (Priyadarshani *et al.*, 2020); and predicting species  
69 distributions based on time series of environmental variables (Capinha *et al.*, 2020).  
70 These tasks all rely on the notion of (dis-) similarity. Clustering involves grouping  
71 similar time series together by maximizing the similarity within groups and  
72 minimizing the similarity between groups (Liao, 2005; Esling and Agon, 2012;  
73 Aghabozorgi *et al.*, 2015). Classification is like clustering, except labels are  
74 predefined and new time series are assigned to existing clusters to which they are  
75 most similar (Keogh and Kasetty, 2003; Esling and Agon, 2012). Prediction may rely  
76 on similarity to determine accuracy by comparing predicted time series against the  
77 originals (Capinha, 2019; Esling and Agon, 2012). Finally, anomaly detection

78 involves comparing time series against an anomaly-free model to determine if they  
79 fall outside of a similarity threshold (Teng, 2010; Esling and Agon, 2012).

80 Similarity between time series can be determined by using distance measures to  
81 measure its inverse: dissimilarity. Dissimilarity is more intuitive as a measurement  
82 because a value of zero occurs when two time series are identical (while similarity is  
83 at a scale-dependent maximum value). Distance measures can be broadly categorized  
84 into four different types: shape-based, feature-based, model-based, and  
85 compression-based. Shape-based distances compare the shapes of time series by  
86 measuring differences in the raw data values (Aghabozorgi *et al.*, 2015; Esling and  
87 Agon, 2012) and can be further divided into lock-step measures and elastic  
88 measures. Lock-step measures compare each time point of one time series to the  
89 corresponding time point of another time series, while elastic measures allow a single  
90 point to be matched with multiple points or no points (Wang *et al.*, 2013). Elastic  
91 measures fall into two groups. The first, Dynamic Time Warping (DTW), computes  
92 an optimal match between two time series by allowing single points to be matched  
93 with multiple points, thus allowing local distortion or “warping” of the time  
94 dimension (Esling and Agon, 2012). The second comprises edit distances, which  
95 compare the minimum number of “edits”, or changes, required to transform one  
96 time series into another (Esling and Agon, 2012). They are based on the concept of  
97 transforming one string into another by changing one letter at a time, with each  
98 “edit” being an insertion, deletion, or substitution. Feature-based distances compute  
99 some feature of time series, such as Discrete Fourier Transforms or autocorrelation  
100 coefficients, and use either a specialized or common distance function (e.g., the  
101 Euclidean distance) to determine the distance between the computed features (Mori  
102 *et al.*, 2016). Model-based distances compare the parameters of models fitted to the  
103 time series, such as autoregressive moving average (ARMA) models, with the  
104 advantage that they can incorporate knowledge about the process used to generate  
105 the time series data (Esling and Agon, 2012). Finally, compression-based distances  
106 assess the similarity of two digital objects according to how well they can be  
107 “compressed” when connected (Esling and Agon, 2012; Cilibrasi and Vitanyi, 2005);  
108 the more similar the objects, the better they compress when joined in series (Esling  
109 and Agon, 2012). Although there are comparatively few model-based and  
110 compression-based distance measures, there are many shape-based and feature-  
111 based measures available.

112 The choice of distance measure for any task should depend on the properties of the  
113 data to be analysed and the nature of the task (Esling and Agon, 2012). In practice,  
114 choosing a distance measure often becomes a matter of convenience. For example,  
115 the well-known and easy to use Euclidean distance is among the most widely used  
116 distance measures, although there are often better choices (Wang *et al.*, 2012;  
117 Paparrizos *et al.*, 2020). When investigating the performance of five distance  
118 measures for comparing animal movement trajectories, Cleasby *et al.* (2019) found  
119 that the most used measure was the least appropriate choice. One problem is that  
120 many distance measures originate within computer science, information science,  
121 systems science, and mathematics, and few are in common use within ecology.  
122 Another problem is that information on the strengths, weaknesses, and appropriate  
123 uses of distance measures is limited and often difficult to find. Some reviews of  
124 distance measures have been published (Liao, 2005; Lhermitte *et al.*, 2011; Esling  
125 and Agon, 2012; Montero and Vilar, 2014; Mori *et al.*, 2016), but are not generally  
126 aimed at ecologists (but see Lhermitte *et al.*, 2011); analysis of the properties of  
127 distance measures is limited, and guidance of how to choose an appropriate distance  
128 measure is either missing or very general. Other studies have analysed the  
129 classification accuracy of multiple distance measures across a variety of datasets  
130 (Wang *et al.*, 2013; Pree *et al.*, 2014; Bagnall *et al.*, 2017; Paparrizos *et al.*, 2020), but  
131 pooled the results to give overall performance scores. This ignores the fact that  
132 different distance measures perform better on different datasets and for different  
133 tasks. Kocher and Savoy (2017) tested 24 distance measures for six properties, then  
134 compared their effectiveness in classification on 13 real-world datasets. However, the  
135 study focused on a single task (author profiling, i.e., determining demographic  
136 information about the author of a document based on the document itself) and did  
137 not present a general method for selecting distance measures for other tasks.  
138 Furthermore, the distance measures that demonstrated all proposed properties did  
139 not perform best on real-world datasets. Mori *et al.* (2015) developed an automated  
140 process for selecting distance measures based on nine quantifiable properties of  
141 datasets. However, their classifier is limited to clustering tasks, and only includes five  
142 common distance measures. We are not aware of any more generalized method of  
143 distance measure selection.

144 In this study, we present a generalized, objective, user-driven method of choosing fit-  
145 for-purpose distance measures for time-series comparison tasks (see Figs 5-6 and

146 Table 1). We evaluate 42 distance measures for 16 properties related to time series  
147 comparison. We then demonstrate our selection method by applying it to a set of  
148 real-world UK bird population trends from a study of the effectiveness of  
149 conservation measures (Jellesmark *et al.*, 2021). Finally, we discuss how to select  
150 appropriate distance measure(s) for any dataset and task.

## 151 **2. Methods**

152 We selected 42 distance measures from the literature (see supplementary materials  
153 Table S1). We chose measures that had already been implemented in publicly  
154 accessible R packages, and that represented each of the categories we defined in the  
155 introduction, as well as a variety of potential use cases. Eighteen of the distance  
156 measures we selected are implemented in the R package ‘TSclust’ and have been  
157 studied for use in clustering time series (Montero and Vilar, 2014). The other twenty-  
158 four are implemented in the R package ‘philentropy’ (Drost, 2018).

159 We defined a set of 16 properties of distance measures that may be of interest in time  
160 series comparison: four metric properties, six value-based properties, five time-based  
161 properties, and one uncategorized property. Metric properties define whether  
162 dissimilarity is measured in metric space (a space that has real physical meaning).  
163 Distance measures that do not demonstrate all the metric properties (semi-metrics  
164 and non-metrics; McCune *et al.*, 2002) are useful, but less intuitive (e.g., negative  
165 distances, or distances between identical objects may be non-zero). Value-based  
166 properties focus on dissimilarities on the y-axis (differences in values; Figs 1-2),  
167 while time-based properties focus on dissimilarities on the x-axis (differences in  
168 time; Fig. 1).

### 169 2.1. Metric properties (adapted from McCune *et al.*, 2002):

170 M1. Zero distance.  $d(X, X) = 0$ . Identical time series should have a dissimilarity  
171 value of zero.

172 M2. Symmetry.  $d(X, Y) = d(Y, X)$ . The dissimilarity value should be the same  
173 regardless of the order in which time series are compared, X to Y or Y to X. A  
174 distance measure without symmetry might, for example, cluster a collection of  
175 time series differently depending on how the time series are ordered.

176 M3. Triangle inequality.  $d(X, Y) \leq d(X, Z) + d(Y, Z)$ . Given three time series, the  
177 distance between any pair of them should never be larger than the sum of the  
178 distances between the other two pairs of time series. This property is related  
179 to Euclidean geometry (one side of a triangle cannot be longer than the other  
180 two combined). A distance measure that does not obey the triangle inequality  
181 is less intuitive to interpret.

182 M4. Non-negativity.  $d(X, Y) \geq 0$ . The dissimilarity value should never be less than  
183 zero.

## 184 2.2. Value-based properties:

185 V1. Translation invariance (also called amplitude shifting invariance or offset  
186 invariance; Fig. 1a).  $d(X + q, Y) = d(X, Y)$ , where  $q$  is any real number  
187 (Batyrshin *et al.*, 2016). If we increase the value of all observations of one time  
188 series by the same amount  $q$ , the dissimilarity value should not change. We  
189 can further define translation *sensitivity*, where the dissimilarity between  $X$   
190 and  $Y$  increases relative to the value of  $q$ , and translation *insensitivity*, where  
191 the dissimilarity between  $X$  and  $Y$  increases by an amount that is independent  
192 of  $q$ . Translation sensitivity can be measured in relative terms, allowing  
193 comparison between distance measures.

194 V2. Amplitude sensitivity (Fig. 1b). Translation sensitivity can be defined on a  
195 local scale (sensitivity to translation of a section of a time series) and in that  
196 case will be referred to as amplitude sensitivity.

197 V3. White noise invariance (invariance against random noise; Fig. 1c).  $d(X + f(X),$   
198  $Y) \approx d(X, Y)$ , where  $f(X)$  is a function that adds a small pseudo-random value  
199 from a normal distribution with a mean of zero and standard deviation  $q$  to  
200 each observation of time series  $X$  (adapted from Lhermitte *et al.*, 2011).  
201 Adding a random noise term to one time series from a pair should have an  
202 inconsequential effect on the dissimilarity value between them. A distance  
203 measure sensitive to white noise will show an increase in dissimilarity values  
204 relative to  $q$ , allowing us to obtain a relative measure of robustness against  
205 white noise. Robustness against white noise might be desirable, e.g., when  
206 comparing trends of stochastic processes, such as population growth.

207 V4. Biased noise invariance (invariance against non-random noise, i.e., noise in a  
208 single direction; Fig. 1d).  $d(X + g(X), Y) \approx d(X, Y)$ , where  $g(X)$  is a function  
209 that adds a small non-random value  $q$  to half of the observations (randomly  
210 chosen) of time series  $X$  (adapted from Lhermitte *et al.*, 2011). Biased noise is  
211 different from random noise in that it is in a single direction and therefore  
212 more likely to be systematic or have important meaning.

213 V5. Outlier invariance (Fig. 1e).  $d(X + h(X), Y) \approx d(X, Y)$ , where  $h(X)$  is a function  
214 that adds a large pseudo-random value  $q$  to a single randomly chosen  
215 observation of time series  $X$ . Outlier sensitivity is thus defined as the  
216 dissimilarity value increasing with  $q$ , and is a specific case of amplitude  
217 sensitivity limited to a single time point. Sensitivity to outliers is useful for  
218 detecting anomalies or disruptive events, but robustness may be preferred  
219 where outliers represent measurement errors or irrelevant anomalies.

220 V6. Antiparallelism bias (see Fig. 2). Antiparallelism refers to line segments or  
221 trends which have slopes with the same value but opposite signs, while  
222 parallelism refers to those which have identical slopes in both value and sign.  
223 A distance measure with positive antiparallelism bias ignores the sign of the  
224 slope and treats antiparallel and parallel trend curves the same. A distance  
225 measure with negative antiparallelism bias treats trend curves with opposite  
226 signs as more dissimilar than those with identical signs. Distance measures  
227 with no antiparallelism bias (neutral) measure absolute differences on the y-  
228 axis, without respect to slope or direction. Whether and which kind of  
229 antiparallelism bias is desirable depends on the application. For example, a  
230 negative antiparallelism bias might be desirable if one is more concerned with  
231 the direction of population trends than their slope.

### 232 2.3. Time-based properties:

233 T1. Phase invariance (Fig. 1f).  $d(X_{i+p}, Y_i) = d(X_i, Y_i)$  (adapted from Lhermitte *et*  
234 *al.*, 2011). Phase invariance is the x-axis equivalent of translation invariance.  
235 If all observations of  $X$  are shifted horizontally by the same value  $p$ , it should  
236 not affect the dissimilarity value. Phase invariance may be a desirable  
237 property to detect similarities that occur separated in time. For example, when  
238 matching audio recordings of bird songs, it is likely that similar songs occur at



239 different time points in different recordings. Conversely, when comparing  
240 population trends of different species within a community or geographical  
241 area to see which ones responded similarly to a disruptive event occurring at  
242 time  $t$ , phase invariance is not a desirable property as responses should match  
243 in time.

244 T2. Time scaling invariance (Fig. 1g).  $d(X_{pi}, Y_i) = d(X_i, Y_i)$  (adapted from Esling  
245 and Agon, 2012). If one time series is expanded or compressed along its time  
246 axis, the dissimilarity value should not change. This property is useful for  
247 certain applications, such as comparing animal behaviour patterns occurring  
248 at different speeds.

249 T3. Warping invariance (Fig. 1h). Time scaling invariance can be defined locally,  
250 i.e., involving the expansion or compression of one or more sections of a time  
251 series, rather than the entire series (Batista *et al.*, 2011). Warping invariance is  
252 particularly useful when matching similar time series which have plateaus or  
253 valleys of uneven lengths.

254 T4. Frequency sensitivity (Fig. 1i). If time series  $Y$  is obtained by applying the  
255 same transformation  $j(t)$  to one or more observations  $t$  of time series  $X$ , such  
256 that  $d(X, Y) > d(X, X)$ , then the dissimilarity value will depend on the number  
257 of observations to which the transformation  $j(t)$  is applied. In other words, if a  
258 distance measure is sensitive to frequency, increasing the number of  
259 differences between two time series should increase the dissimilarity value.

260 T5. Duration sensitivity (Fig. 1j). If time series  $Y$  is obtained by applying the same  
261 transformation  $k(t)$  to one or more consecutive observations of time series  $X$ ,  
262 such that  $d(X, Y) > d(X, X)$ , then the dissimilarity value will depend on the  
263 number of consecutive observations to which the transformation  $k(t)$  is  
264 applied. This property is a special case of frequency sensitivity. Distance  
265 measures which are sensitive to duration must be sensitive to frequency, but  
266 the converse is not true.

#### 267 2.4. Other properties:

268 N1. Non-positive value handling. Some distance measures will not return results if  
269 the data contains negative values or zeros. This has implications e.g., for tasks

270 such as classification, where it is common to first perform min-max  
271 normalization to rescale time series values to  $[-1,1]$ .

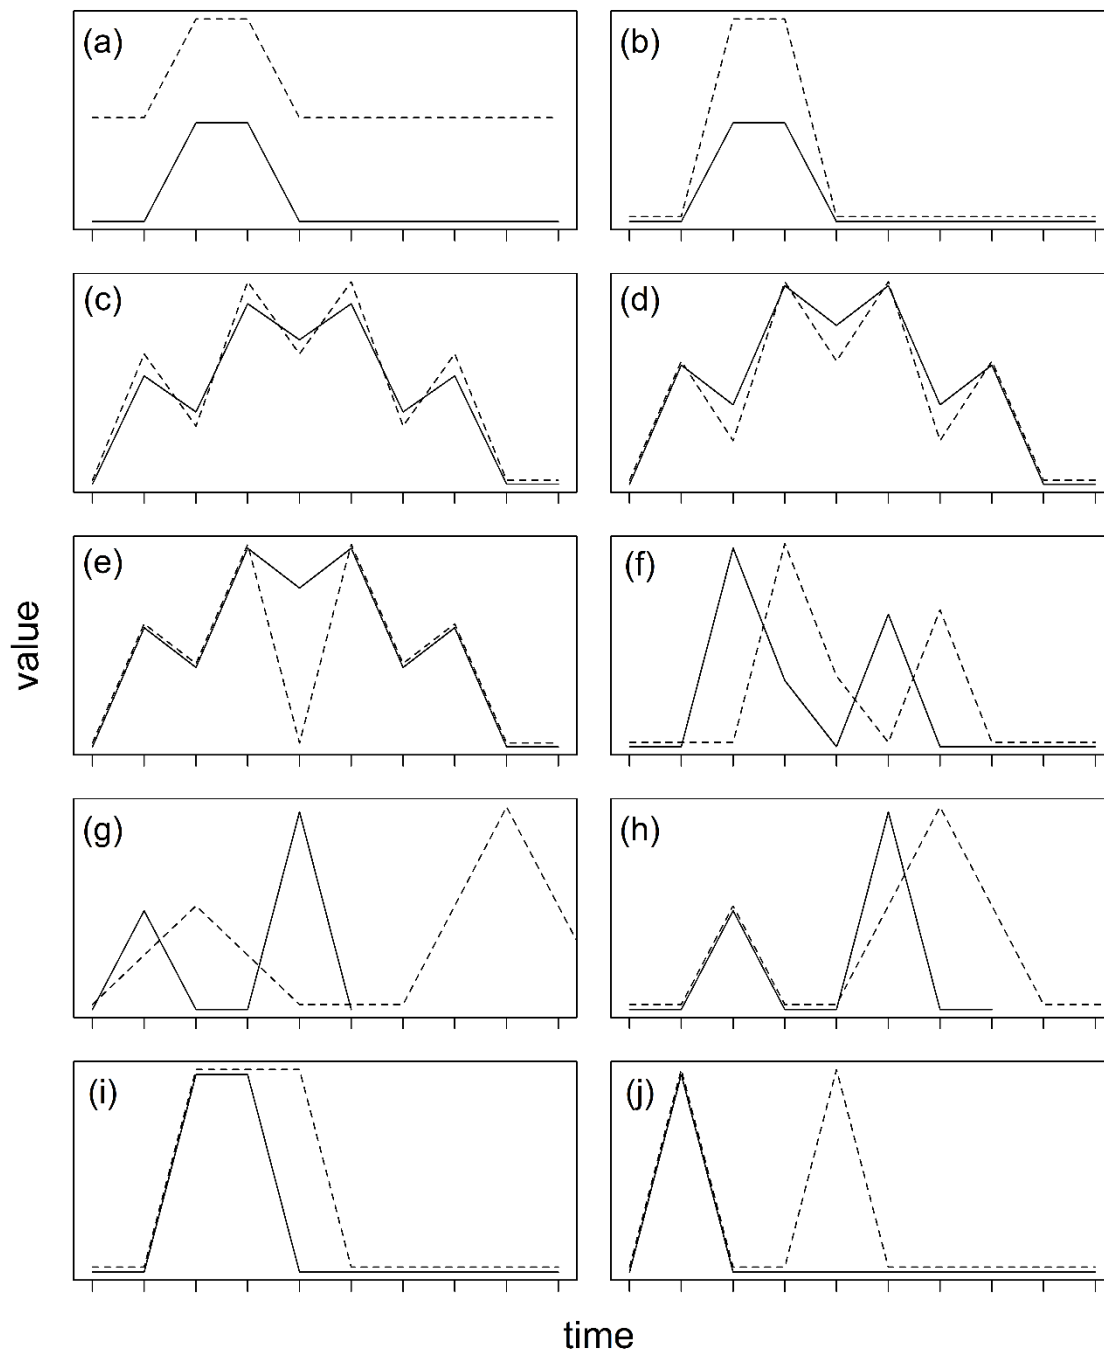

272

273 Figure 1. Illustration of time series distortions used to demonstrate sensitivities or invariances of  
274 distance measures to: a) translation; b) amplitude; c) white noise; d) biased noise; e) outliers; f)  
275 phase; g) time scaling; h) warping; i) duration; and j) frequency. A dissimilarity value of zero (or  
276 equivalent, for any distance measure not demonstrating uniqueness) between any of the illustrated  
277 pairs of time series would indicate an invariance to that type of distortion.

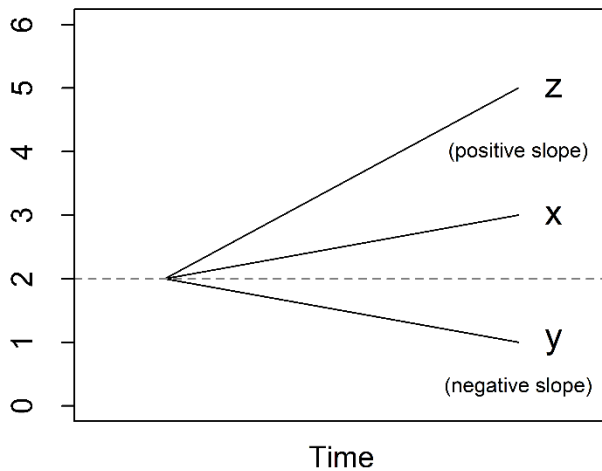

278

279 Figure 2. Illustration of antiparallelism bias. Time series x and y are antiparallel (y has the same slope  
280 as x, but in the opposite direction), while z has a different slope than x, but in the same direction. The  
281 total difference in values between x and z is the same as that between x and y. Distance measures with  
282 positive antiparallelism bias rate time series x as more dissimilar to time series z than to time series y,  
283 while the opposite is true for those with negative antiparallelism bias. Distance measures with neutral  
284 antiparallelism bias rate the time series pairs as equally dissimilar.

285

## 286 2.5. Metric properties tests:

287 The metric properties of some distance measures are specified in the literature, but  
288 for others it is unclear. Therefore, we devised a set of tests for metric properties (see  
289 supplementary materials for details). We confirmed the robustness of our tests by  
290 comparing our results to the literature for distance measures with known metric  
291 properties.

## 292 2.6. Time-based and value-based properties tests:

293 We performed two types of testing for non-metric properties in this study. Controlled  
294 testing was performed on sets of short, simple time series to clearly demonstrate  
295 specific properties. However, the demonstrated properties may not translate as  
296 clearly onto real-world datasets, and the behaviour of distance measures may vary  
297 depending on the types of time series involved (see Lhermitte *et al.*, 2011). Therefore,  
298 we employed uncontrolled testing by applying functions to real-world time series to  
299 induce differences, then comparing the altered time series to their unaltered  
300 counterparts. We applied the functions over a range of parameters, then plotted the  
301 resulting curves to show how responses of distance measures vary with magnitude.  
302 For full details, see supplementary materials.

303

## 304 2.7. Controlled testing:

305 We created sets of short time series to demonstrate each property. We devised tests  
306 for all value-based and time-based properties (see supplementary materials for  
307 details) and applied the tests to all distance measures. For V1-V5, T4, and T5, we  
308 separated the resulting values into five bins, which we designated as “very low,”  
309 “low,” “medium,” “high,” or “very high.” For T1-T3, results were not binned. Distance  
310 measures were designated “sensitive” for a given property if the distance was directly  
311 dependent on the phase difference or degree of scaling or warping. For all  
312 sensitivities and invariances, distance measures were classified as “invariant” if they  
313 returned zero values for all time-series pairs, “insensitive” if the same non-zero value  
314 was returned for all time-series pairs, or “unpredictable” if distance values varied but  
315 did not show a clear relationship. All measures that were unable to handle unequal-  
316 length time series were designated “n/a” for uniform time scaling invariance and  
317 warping invariance.

318 Antiparallelism bias was tested by comparing pairs of time series that differed by the  
319 same relative amount in different directions. Distance measures were designated as  
320 “positive” bias if they gave a greater dissimilarity value to pairs of time series  
321 differing in opposite directions than to pairs differing in the same direction,  
322 “negative” bias if they gave a greater dissimilarity value to those differing in the same  
323 direction, or “neutral” if they assigned each pair of time series the same dissimilarity  
324 value.

## 325 2.8. Uncontrolled testing:

326 We created a function for each property to be tested, which applies a transformation  
327 to one or more time points of a real-world time series. Each function accepts a value  
328  $q$ , the purpose of which varies depending on the function (see supplementary  
329 materials for details). For example, the translation function adds a real number  $q$  to  
330 every value of a time series. The transformed time series is returned as output and  
331 compared against its unaltered counterpart. We applied the functions to a range of  $q$   
332 in increments, then graphed the results as response curves (see Figs S5-S8 in  
333 supplementary materials). We did not compare them against a reference or assign

334 sensitivity ratings, as they were intended only as a confirmatory check against the  
335 results of controlled testing.

#### 336 2.9. Selection process:

337 We devised a selection process to guide researchers through determining the most  
338 appropriate distance measure(s) for their intended application. First, use the  
339 decision tree (Figs 5-6) to select a general category of distance measures. Next, use  
340 Table 1 to determine which pre-processing steps might be necessary to prepare the  
341 dataset and/or to further narrow the choice of distance measures. Finally, determine  
342 which properties will be most important to achieve the desired outcome and use Figs  
343 S1-S3 (see supplementary materials) to narrow the selection to the distance  
344 measures which exhibit these properties. We demonstrate the selection process on a  
345 real-world dataset.

#### 346 2.10. Example datasets:

347 We used a dataset from a study of conservation impact of wet grassland reserves on  
348 breeding birds in the UK (Jellesmark *et al.*, 2021). The dataset consists of 25 years of  
349 breeding pair count data for five wading bird species, from within and outside of  
350 reserves. The within-reserves data came from 47 RSPB lowland wet grassland  
351 reserves, while the counterfactual (outside of reserves) data was selected from the  
352 UK Breeding Bird Survey data. Data were matched to select sites that represent how  
353 reserve land would look in the absence of conservation measures. The reserve and  
354 counterfactual count data were aggregated into species trends, then converted to  
355 indices by dividing each annual species count total by the first-year species count  
356 total. Thus, each of the five bird species was represented with a reserve trend index  
357 and a matched counterfactual trend index. Jellesmark *et al.* (2021) compared each  
358 pair of indices to determine the effects of conservation efforts on each bird species,  
359 by calculating the percentage improvement of reserve indices over counterfactual  
360 indices and performing t-tests to determine significance and effect size of the  
361 difference. We ranked the results of Jellesmark *et al.* (2021) according to both  
362 percentage improvement and effect size. We then applied our selection method to  
363 select appropriate distance measures, ranked the dissimilarity results returned by  
364 each selected distance measure, and examined the rankings with respect to

365 Jellesmark *et al.* (2021). We also ranked the results returned by rejected distance  
366 measures as a reference (see supplementary materials).

### 367 **3. Results**

#### 368 3.1. Metric test results:

369 Fourteen out of 42 distance measures were identified as full metrics, meaning they  
370 passed the metric tests for uniqueness, symmetry, non-negativity, and the triangle  
371 inequality (see Fig. S1). Sixteen distance measures were identified as semi-metrics  
372 (failed the triangle inequality test but passed the other three tests) and 12 were  
373 identified as non-metrics (failed at least one of the tests for uniqueness, symmetry, or  
374 non-negativity; Fig. S1). However, in some cases results depended on settings or  
375 input values (some distance measures passed the triangle inequality and/or non-  
376 negativity tests only when inputs were constrained to non-negative real numbers).  
377 All tested feature-based and model-based distances were full metrics, while all tested  
378 compression-based distances were non-metrics. Shape-based measures showed  
379 mixed results, even within families and groups.

#### 380 3.2. Sensitivity test results:

381 Lock-step shaped-based measures varied in the strength of responses to the  
382 sensitivity tests, but none tested as unpredictable and only two (the Chebyshev  
383 distance and the Short Time Series, or STS, distance) showed any invariances or  
384 insensitivities. There were no clear differences between families of distance  
385 measures, with responses seeming to vary as much within families as between them.  
386 Elastic, feature-based and model-based distances showed greater variation in  
387 responses, with insensitivities, invariances, and unpredictability being common. The  
388 two compression-based distances we tested responded unpredictably to all controlled  
389 tests except translation and outliers; they responded unpredictably to *all*  
390 uncontrolled tests without exception. See supplementary materials for more detailed  
391 results.

#### 392 3.3. Time-based invariances and other test results:

393 All distance measures except the Time Alignment Measurement (TAM) distance  
394 responded unpredictably to phase invariance testing. TAM was sensitive to phase  
395 changes, however the response curve in uncontrolled testing was not smooth,

396 suggesting some level of unpredictability. The Edit Distance with Real Penalty (ERP)  
397 distance was sensitive to uniform time scaling, while all other distances either  
398 responded unpredictably or were unable to be tested due to an inability to handle  
399 unequal-length time series. Warping sensitivity was more common, occurring in  
400 three elastic distance measures. DTW tested as invariant to warping and was thus the  
401 only distance measure we tested with any time-based invariances. Elastic measures  
402 were the only group of distance measures that showed any predictable time-based  
403 sensitivities or time-based invariances.

404 Two distance measures in the Shannon's entropy family were unable to deal with  
405 zeros, while the entire family was unable to deal with negative values. Three other  
406 lock-step shape-based measures also showed an inability to deal with negative  
407 values. Antiparallelism bias showed no obvious group-based patterns, but negative  
408 antiparallelism bias was most common and positive bias was least common.

409

410

411

412

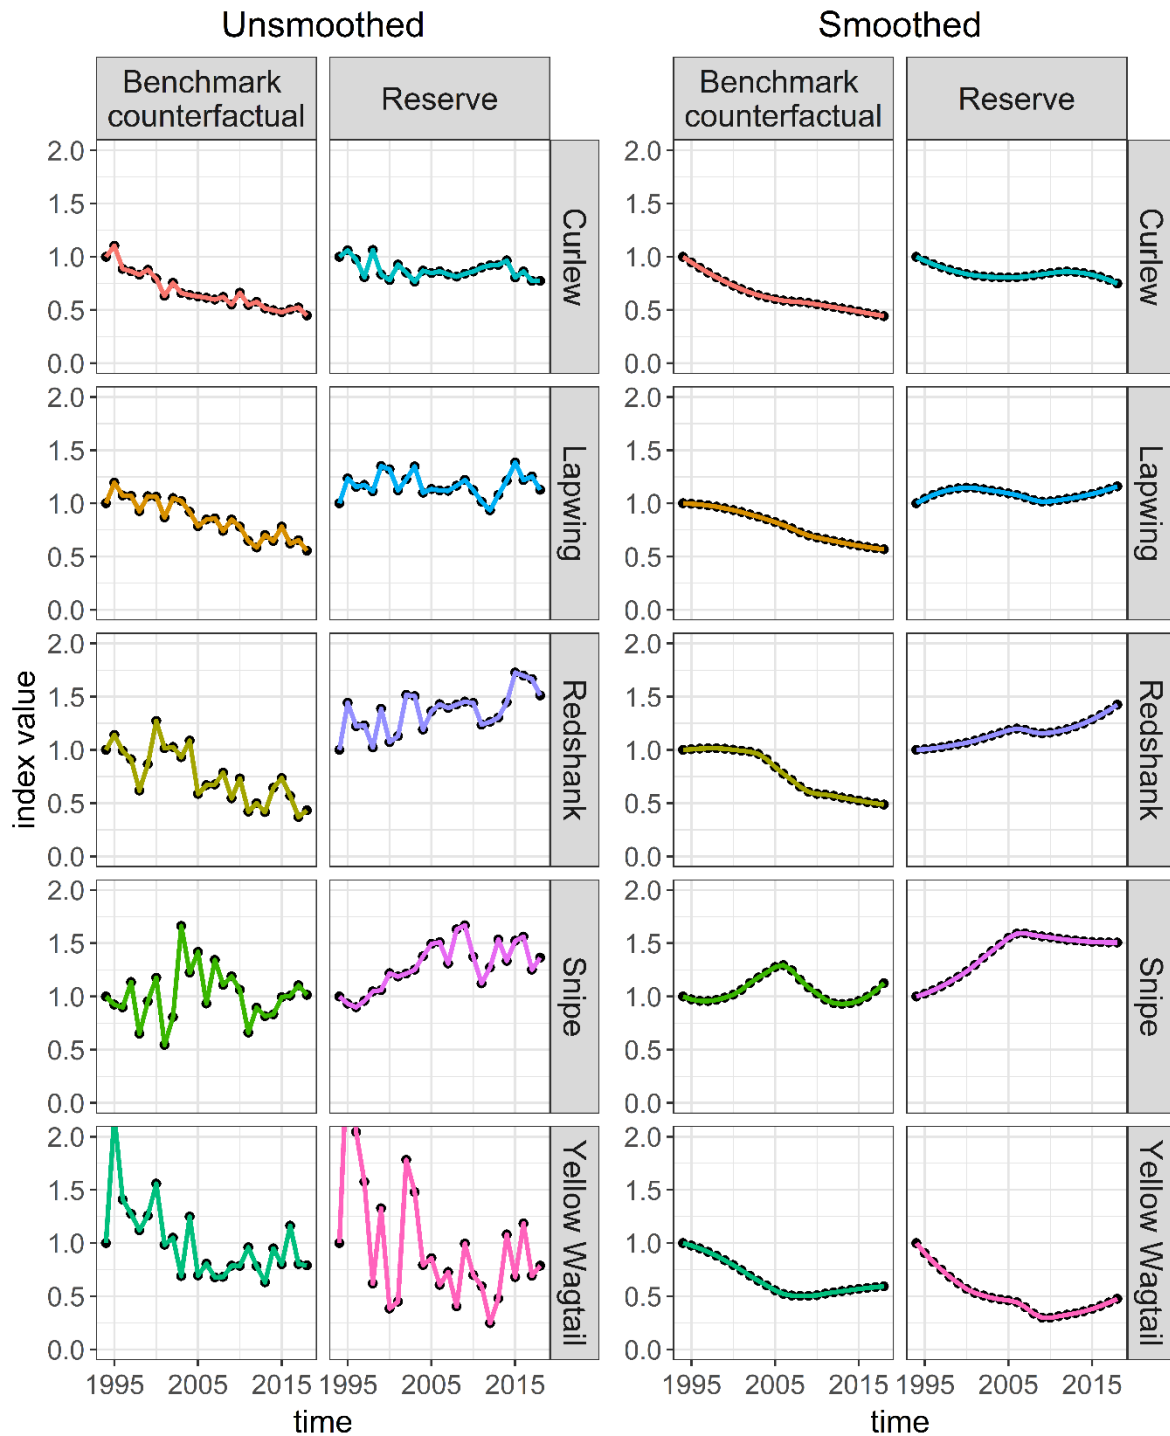

413

414 Figure 3. Reserve and counterfactual trends for five wading bird species that breed on RSPB lowland

415 wet grassland reserves in the UK. Left: Unsmoothed trends based on original data presented in

416 Jellesmark et al. (2021). Right: LOESS smoothed trends with a span setting of 0.75.

417

418

419

420



#### 421 3.4. Selection process:

422 We began by examining our wading bird dataset in context of the decision trees in  
423 Figs 5-6. It consisted exclusively of short (25 data points), non-stationary time series.  
424 Following Fig. 5, we focused on shape-based distance measures, which compare raw  
425 data values. As the time series were of equal-length, in phase, using the same time  
426 scale, and without any missing data points, both lock-step and elastic measures  
427 would be appropriate (Fig. 6).

428 Next, we worked through Table 1. As our wading bird trends were indexed to a  
429 starting value of one (Fig. 3), they had the same starting value and the same value  
430 scale. There were no negative values because the trends were indexed and based on  
431 wetland bird counts; nor were there any zeroes. However, we did notice that some of  
432 our time series were noisy (Fig. 3), which could obscure the trends. Noise is a  
433 common characteristic of population data, largely due to the stochasticity of  
434 population dynamics and the environmental variables they depend on (Vasseur and  
435 Yodzis, 2004). While this noise is often white (random, uncorrelated), biased ‘red’  
436 noise (positively autocorrelated, tending toward a single direction) is also common,  
437 e.g., when environmental conditions are above or below average for an extended  
438 period (Vasseur and Yodzis, 2004; van de Pol *et al.*, 2011). Biased noise is therefore  
439 more likely to represent a legitimate difference in trends. There are multiple ways to  
440 deal with noisy time series (Table 1). We first tried the properties-based solution  
441 (Table 1; see below for the pre-processing solution). Using Fig. S2, we filtered out all  
442 shape-based distance measures with a white noise sensitivity category of medium or  
443 higher (a sensitivity value of 0.7 or more). Next, we required biased noise to be at  
444 least two categories higher in sensitivity than white noise (Fig. S2; e.g., if white noise  
445 sensitivity was very low, biased noise sensitivity must be at least medium). Our  
446 choices here were based on practicality; sensitivity categories are arbitrary (we  
447 categorized them for convenience), so we wanted to avoid being too specific while  
448 ensuring that any chosen distance measure exhibited a non-trivial difference in  
449 sensitivity between white noise and biased noise.

450 Finally, we considered the remaining properties in the context of our intended task  
451 and desired outcome. We deemed amplitude sensitivity to be important, as we were  
452 interested in the overall divergence between population indices within and outside  
453 reserves. Duration sensitivity was also important, as we would consider population

454 indices which diverge more steeply or for a longer period to be more different, i.e.,  
455 that conservation measures had a stronger effect on these species. Therefore, both  
456 amplitude and duration sensitivity had to be at least low (a sensitivity value of 0.2 or  
457 higher; Fig. S2). Again, we could have chosen a different (higher) category, but we  
458 were more concerned with making sure the distance measures exhibited *some*  
459 sensitivity to these properties than the exact degree of sensitivity. We did not filter  
460 for antiparallelism bias, as the high stochasticity in some of our time series (Fig. 3)  
461 would dilute the signal too much for it to matter.

462 This selection process left us with two distance measures: the K-Divergence (KDiv)  
463 and the Kullback-Leibler distance (Kullback), both of which returned the same  
464 rankings that Jellesmark *et al.* (2021) obtained using percent improvement (Fig. 4).  
465 Only one of the 40 unselected distance measures returned the same rankings.  
466 Results from unselected distance measures are in supplementary materials S10 and  
467 S15.

468 Another way of dealing with noisy time series is by applying a smoothing algorithm  
469 (Table 1). We applied a LOESS smoothing algorithm (span = 0.75) to all time series  
470 in the dataset to remove the noise and reveal the trends (Fig. 3). We then re-ran the  
471 selection process using the same settings, except that we did not filter for noise  
472 sensitivity, and we added a filter for antiparallelism bias. Antiparallelism bias is not  
473 very important when dealing with highly stochastic time series because the signals  
474 for slope and direction are muddied by noise; however, smoothing introduces strong  
475 positive autocorrelation, making the slope and direction signals clear. We selected  
476 neutral for antiparallelism bias (Fig. S3) because we were more interested in relative  
477 differences in the population indices than the direction of change.

478 We were left with seven distance measures: ERP, the Euclidean distance, the  
479 Manhattan distance, the Gower distance, the Lorentzian distance (Lorentz), the  
480 Average distance (AVG), and the Squared Euclidean distance (Sq. Euclid). All seven  
481 selected distance measures agreed on the following order: Redshank, Snipe,  
482 Lapwing, Curlew, Yellow Wagtail (Fig. 4). Four of the 35 unselected distance  
483 measures returned the same results. See supplementary materials S10 and S15 for  
484 complete results from unselected distance measures.

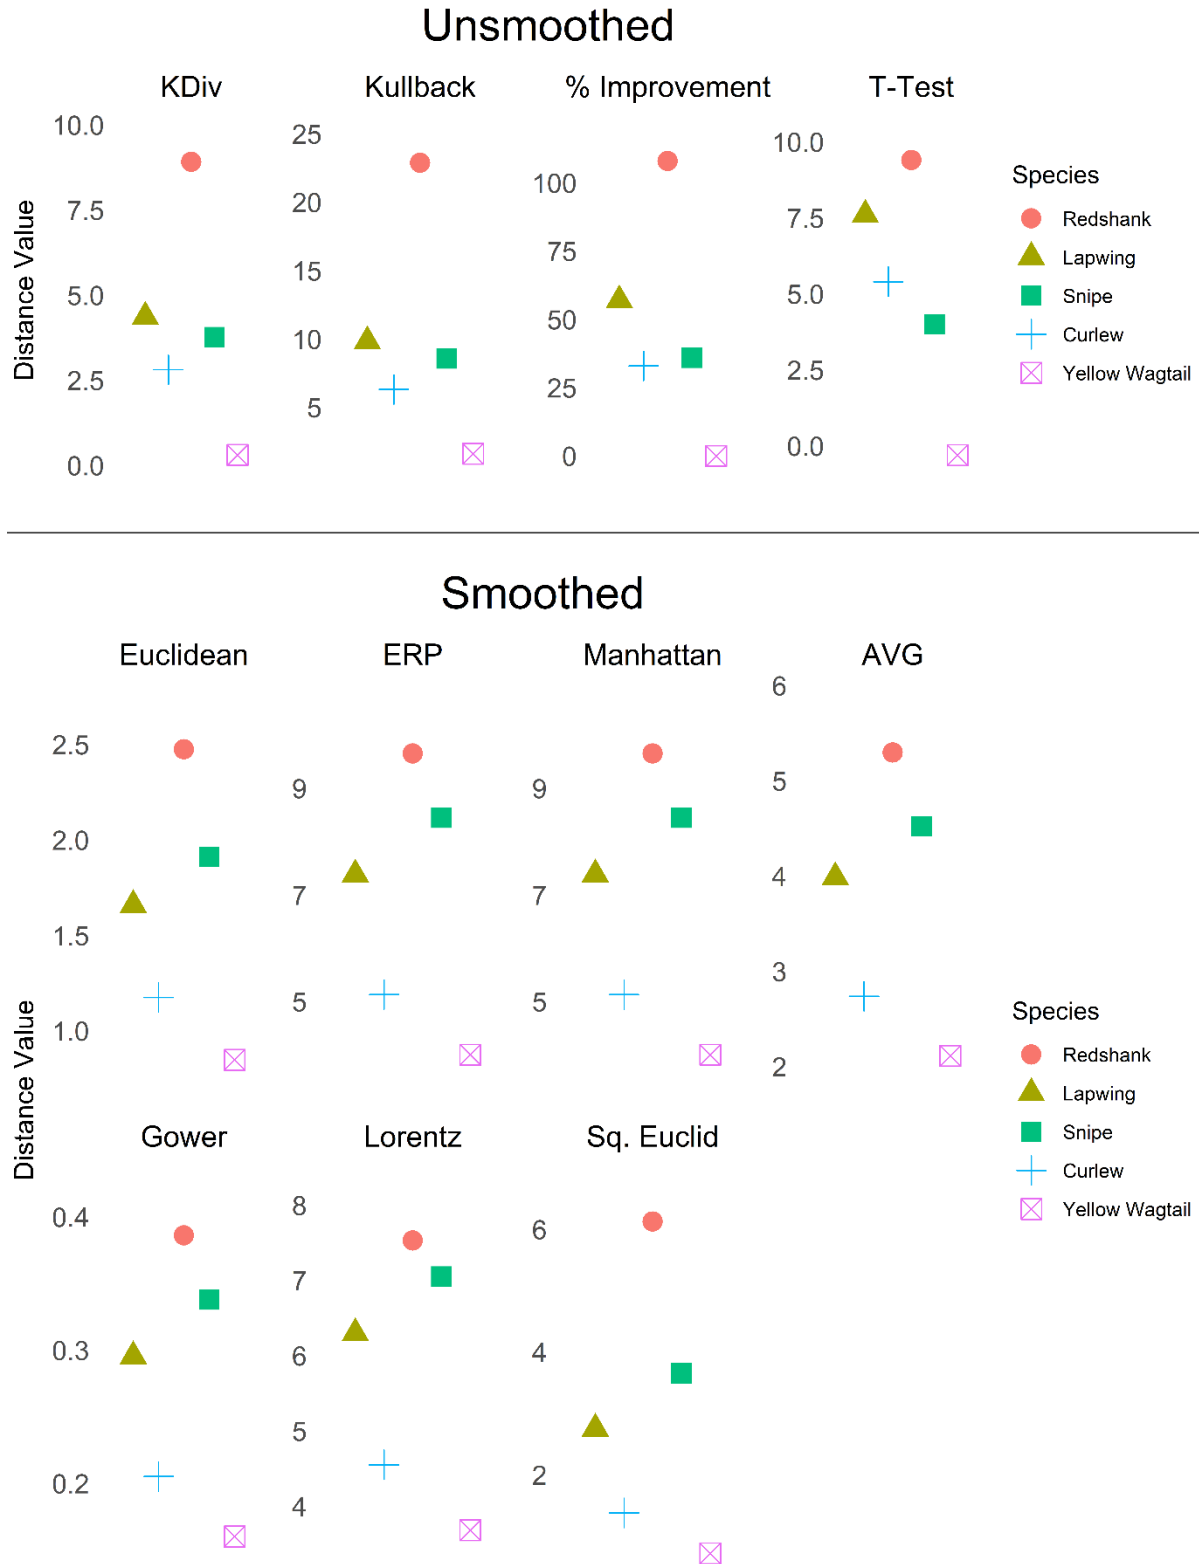

485  
 486 Figure 4. Comparative rankings of conservation impact on five wading bird species. Values on the y-  
 487 axis represent the distance between unsmoothed (top) or LOESS smoothed (bottom) reserve and  
 488 counterfactual trends for each species. Results are from the distance measures chosen by our selection  
 489 process, as well as the percent improvement and t-test methods (top) used by Jellesmark *et al.* (2021).  
 490

### Choosing a distance measure category:

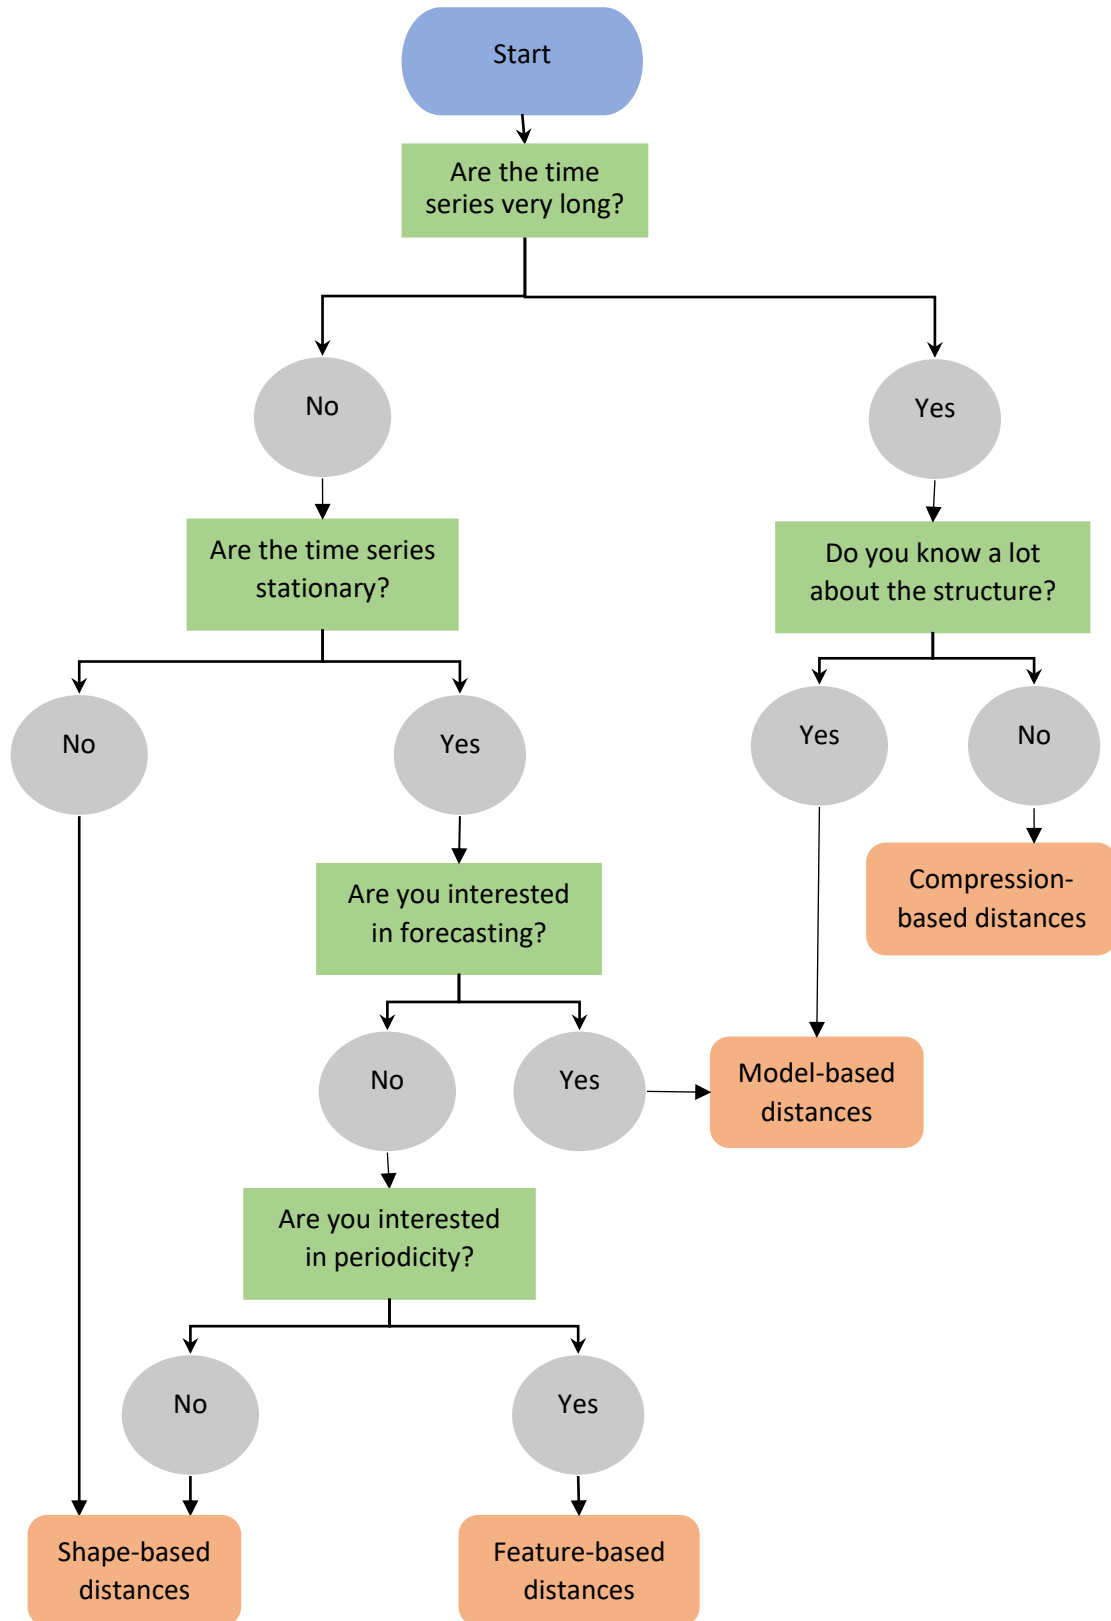

491

492 Figure 5. Decision tree to aid in choosing a distance measure category.

## Choosing between elastic and lock-step shape- based measures

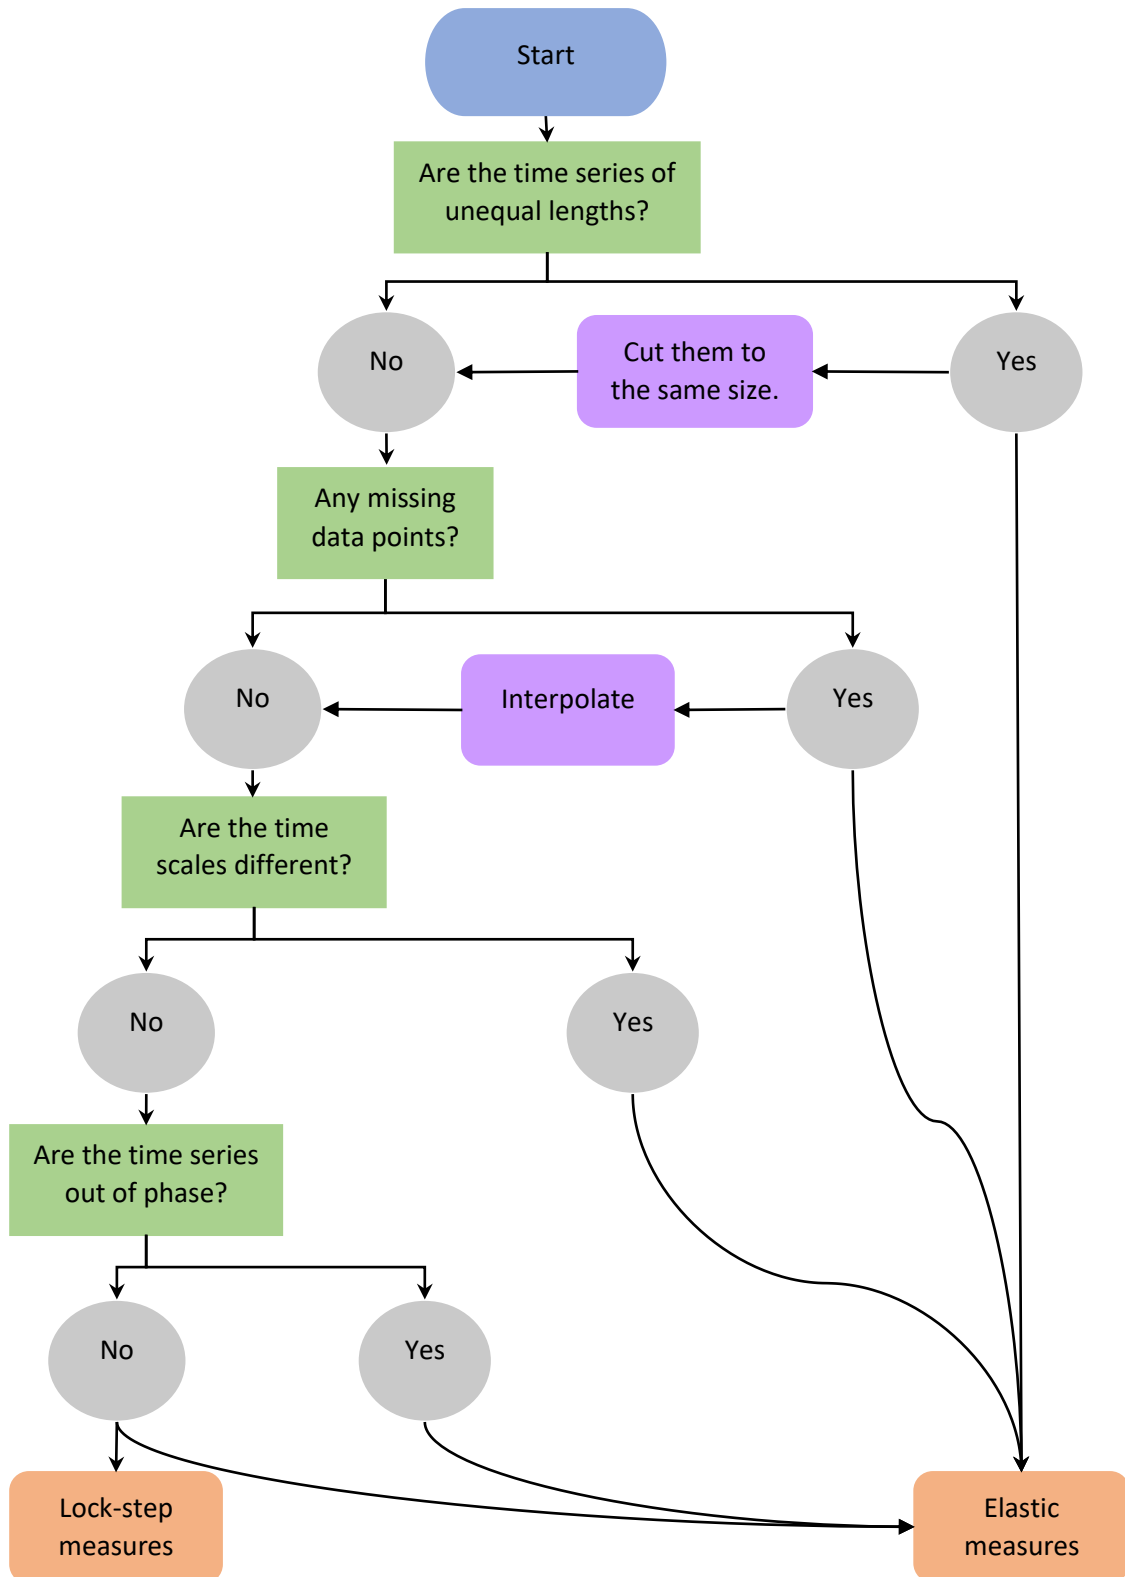

493

494 Figure 6. Decision tree to aid in choosing a sub-category of shape-based distance measures.

495

496 Table 1. Solutions to potential issues in the data. Note that choice of invariance or sensitivity as a  
 497 solution should depend on whether the difference in question is important.

| Problem                                            | Pre-processing solution                   | Properties-based solution                                                                       |
|----------------------------------------------------|-------------------------------------------|-------------------------------------------------------------------------------------------------|
| Missing data points                                | Interpolate missing values.               | Choose an elastic distance. They handle gaps through one-to-none or one-to-many point matching. |
| Different starting values but similar value scales | Apply a translation shift.                | Choose a distance measure invariant (or sensitive) to translation.                              |
| Different value scales                             | Normalize or standardize data.            |                                                                                                 |
| Zeros or negative values                           | Transform data to obtain positive values. | Choose a distance with non-positive value handling.                                             |
| Noise                                              | Apply a smoothing algorithm.              | Choose a distance measure robust (or sensitive) to the type of noise that is of concern.        |
| Out of phase                                       |                                           | Choose a phase invariant (or phase sensitive) distance measure.                                 |
| Unequal lengths                                    | Cut all time series to the same length.   | Choose an elastic, model-based or compression-based distance measure.                           |
| Different time scales                              |                                           | Choose a distance measure invariant (or sensitive) to uniform time scaling.                     |

498

#### 499 **4. Discussion**

500 The aim of this study was to provide enough information to make informed, objective  
 501 decisions about which distance measures to use. We tested 42 distance measures for  
 502 16 properties and presented an objective method of selecting distance measures for  
 503 any task based on those properties. We demonstrated the viability of the method on a  
 504 real-world dataset by selecting distance measures to rank differences between pairs  
 505 of wading bird population trends (within and outside of reserves) and showing that  
 506 the distance measures we selected were fit-for-purpose and consistent in their  
 507 rankings. The method is user-directed; therefore, success depends on an  
 508 understanding of the dataset, the task to be performed, and the hoped-for outcome.

509 Time series length and stationarity inform what category of distance measures the  
 510 user should focus on (Fig. 5). Shape-based distances are best for short time series  
 511 with differences that are easy to visualize, while longer, stationary time series may be  
 512 better suited to feature-based, model-based, or compression-based distance  
 513 measures (Esling and Agon, 2012).

514 The results of our properties tests showed a variation in strength of sensitivity to  
515 different properties in different distance measures (Fig. S2), although most distance  
516 measures were highly sensitive to outliers (Fig. S2). Invariances were uncommon  
517 among the distance measures we tested (Fig. S2 and S3), although several distance  
518 measures did demonstrate invariance to translation (Fig. S2). Some distance  
519 measures, such as the Edit Distance for Real Sequences (EDR) and ERP, have  
520 settings that may affect their behaviour. In the case of ERP, settings can determine  
521 whether and how sensitive it is to missing values, while in the case of EDR, the  
522 threshold setting determines how far apart values must be to be considered different,  
523 and therefore serves to toggle responses to multiple properties between invariance  
524 and sensitivity.

525 When dealing with time series of unequal length or missing data points, distance  
526 measures that allow unequal matching (e.g., matching multiple points to one point),  
527 such as DTW, or that allow gaps, such as ERP, may be the solution. Alternatively,  
528 pre-processing of data may remove such concerns. For example, missing data points  
529 can be filled in by interpolation, or longer time series can be cut to the same length as  
530 shorter ones (only attempt such solutions if they make sense for the data).

531 Elastic measures, such as DTW, EDR, and ERP, are the most versatile distance  
532 measures, able to handle many common complications of datasets with little or no  
533 pre-processing. For general tasks, they are often a good option (see our decision tree:  
534 Figs 5-6). However, for tasks involving large datasets containing thousands of time  
535 series, some elastic measures may be impractical due to processing speed. Much of  
536 the research into speeding up time series comparisons for large datasets has focused  
537 on a select few distance measures, especially the Euclidean Distance and DTW. While  
538 the Euclidean Distance is faster, better known, and still widely used in some fields,  
539 an extensive body of research has shown DTW to be more accurate (Zhu *et al.*, 2012;  
540 Dau *et al.*, 2019; Paparrizos *et al.*, 2020) and it is considered the *de facto* standard  
541 for accuracy in classification (note that it is still important to consider the properties  
542 of DTW in relation to the data, as it does not perform well in every case). Despite  
543 this, it is rarely used in ecology (Hegg and Kennedy, 2021). Note, however, that DTW  
544 is computationally expensive and therefore can be slow for large datasets (for  
545 discussion on ways to speed up DTW, see supplementary materials S11).

546 For many analyses involving distance measures, researchers may first want to  
547 normalize or standardize their data or translate it along the y-axis. This may be an  
548 important step if the time series use different scales or have different starting values.  
549 For example, when performing classification or clustering tasks, it is common to  
550 apply z-normalization to rescale time series to a mean of zero and standard deviation  
551 of one (Rakthanmanon *et al.*, 2013). Min-max normalization to a scale of [0,1] or [-  
552 1,1] is also common for datasets that are not normally distributed. Be aware,  
553 however, that these transformations may affect the subsequent choice of distance  
554 measures, as some cannot handle zeros or negative values and some metrics are non-  
555 metric when there are negative values present (see Fig. S1).

556 Although we ignored the metric properties of distance measures for our real-world  
557 example, they are very important for some tasks. For example, many algorithms for  
558 classification and clustering are designed to work only in metric space and may  
559 return unexpected results for non-metric distances (Weinshall *et al.*, 1999).

560 Noise is a common aspect of ecological time series, as environmental and population  
561 dynamics are stochastic. There are several potential ways to deal with noisy time  
562 series. Some distance measures, such as EDR, have threshold settings; any difference  
563 between time series that falls below the threshold will be ignored. If the noise is  
564 relatively uniform in amplitude, this may be a simple solution if the distance measure  
565 in question meets all other requirements. Other distance measures, such as KDiv, are  
566 relatively robust against white noise although lacking a sensitivity setting, and may  
567 be more appropriate if the noise is less uniform. A more drastic solution is to apply a  
568 smoothing algorithm as a pre-processing step, though this should be approached  
569 with caution. Smoothing will remove noise and outliers but may distort the time  
570 series in the process. Therefore, it is important to avoid over-smoothing. Smoothing  
571 time series that have sudden and/or drastic value changes may also be problematic,  
572 particularly if these changes are an important aspect of differentiation between time  
573 series.

574 Our demonstration using data from Jellesmark *et al.* (2021) served to illustrate both  
575 the potential benefits and complications introduced by smoothing. When we filtered  
576 by noise sensitivity, we were left with two distance measures; both returned the same  
577 results as the percentage difference calculations by Jellesmark *et al.* (2021). When we  
578 ran the method after applying a smoothing algorithm, we were left with a larger



579 choice of seven distance measures. Although the ordering differed slightly from  
580 Jellesmark *et al.* (2021), all seven distance measures agreed. The slight difference in  
581 ordering (Snipe vs Lapwing, ambiguous from visual inspection of the trends; Figs 3-  
582 4) is unsurprising given that the smoothing algorithm removed all noise from the  
583 trends, while the distance measures we selected using noise filtering, although  
584 demonstrating very low sensitivity to white noise, were not invariant to it. Smoothing  
585 in this case gave us more distance measures to choose from, but with the added  
586 complication of not knowing whether we had improved or distorted our results.

587 While in both cases (smoothed and unsmoothed trends) there were distance  
588 measures that gave the same rankings as Jellesmark *et al.* (2021) despite not  
589 matching our selection criteria (see supplementary materials S10), the distance  
590 measures we selected were all in agreement. Had we been less specific when  
591 choosing important properties, we would have risked including measures that were  
592 not fit-for-purpose. A single suitable distance measure is better than any number of  
593 ill-suited measures.

## 594 **5. Conclusion**

595 Distance measures are widely used in ecology, but the selection of distance measures  
596 described in the ecological literature is limited and their use is often poorly  
597 understood, leading to misuse. In the wider literature, there are hundreds of distance  
598 measures, with new ones frequently described. This study introduces a selection of  
599 42 distance measures for the purpose of ecological time series analysis and describes  
600 an objective method for choosing an appropriate distance measure for any task  
601 involving time series. This should lead to an improved understanding of, and greater  
602 scope for, the use of distance measures for comparing time series within the field of  
603 ecology. Nonetheless, it is up to the user to think their way through the process.

604 There are hundreds of potential cases for using distance measures to compare time  
605 series in ecology, and as many potential issues that may arise in the process. Most of  
606 them are beyond the scope of this study. However, we hope that we have covered the  
607 basics and provided enough data and theory on distance measures and their  
608 properties to help select one that is appropriate for the task. There is not always a  
609 right choice of distance measure, but there are wrong ones, and our main goal is to  
610 help avoid those.

611

## 612 **Authors' Contributions**

613 SD, DM, RF, and MB conceived the ideas; SJ produced the wading bird indices; SD  
614 designed the methodology, wrote the code, produced the simulated data, analysed  
615 the data, and wrote the manuscript, with input from all authors; all authors  
616 contributed critically to the drafts and gave first approval for publication.

## 617 **Acknowledgements**

618 We thank Gonzalo Albaladejo-Robles and Bouwe Reijenga for their support. This  
619 project has received funding from the European Union's Horizon 2020 research and  
620 innovation programme under the Marie Skłodowska-Curie grant agreement No  
621 766417.

## 622 **Data availability**

623 We used data from multiple sources, as well as simulated data, for this study. R  
624 scripts to recreate all simulated data and reproduce all results are available on github  
625 at [https://github.com/shawndove/Trend\\_compare](https://github.com/shawndove/Trend_compare), and will be versioned and  
626 archived at Zenodo upon acceptance of the manuscript. Wading bird indices  
627 produced from data provided by the RSPB and UK Breeding Bird Survey will be  
628 archived at Zenodo upon acceptance of the manuscript. Datasets from the UCR Time  
629 Series Classification Archive are available at  
630 [https://www.cs.ucr.edu/~eamonn/time\\_series\\_data\\_2018/](https://www.cs.ucr.edu/~eamonn/time_series_data_2018/).

## 631 **Conflict of Interest**

632 The authors have no conflict of interest to declare.

## 633 **References**

- 634 1. Aghabozorgi, S., Shirkhorshidi, A. S., & Wah, T. Y. (2015). Time-series clustering—a  
635 decade review. *Information Systems*, *53*, 16-38. DOI: 10.1016/j.is.2015.04.007
- 636 2. Bagnall, A., Lines, J., Bostrom, A., Large, J., & Keogh, E. (2017). The great time series  
637 classification bake off: a review and experimental evaluation of recent algorithmic  
638 advances. *Data mining and knowledge discovery*, *31*(3), 606-660. DOI:  
639 10.1007/s10618-016-0483-9

- 640 3. Batista, G. E., Wang, X., & Keogh, E. J. (2011). A complexity-invariant  
641 distance measure for time series. In *Proceedings of the 2011 SIAM*  
642 *international conference on data mining* (pp. 699-710). Society for Industrial  
643 and Applied Mathematics. DOI: 10.1137/1.9781611972818.60
- 644 4. Batyrshin, I., Solovyev, V., & Ivanov, V. (2016). Time series shape association  
645 measures and local trend association patterns. *Neurocomputing*, 175, 924-934. DOI:  
646 10.1109/BRICS-CCI-CBIC.2013.42
- 647 5. Boero, F., Kraberg, A. C., Krause, G., & Wiltshire, K. H. (2015). Time is an affliction:  
648 why ecology cannot be as predictive as physics and why it needs time series. *Journal*  
649 *of Sea Research*, 101, 12-18. DOI: 10.1016/j.seares.2014.07.008
- 650 6. Capinha, C. (2019). Predicting the timing of ecological phenomena using dates of  
651 species occurrence records: a methodological approach and test case with  
652 mushrooms. *International journal of biometeorology*, 63(8), 1015-1024. DOI:  
653 10.1007/s00484-019-01714-0
- 654 7. Capinha, C., Ceia-Hasse, A., Kramer, A. M., & Meijer, C. (2020). Deep learning for  
655 supervised classification of temporal data in ecology. *bioRxiv*. Preprint. DOI:  
656 10.1101/2020.09.14.296251
- 657 8. Cilibrasi, R., & Vitányi, P. M. (2005). Clustering by compression. *IEEE Transactions*  
658 *on Information theory*, 51(4), 1523-1545. DOI: 10.1109/TIT.2005.844059
- 659 9. Cleasby, I. R., Wakefield, E. D., Morrissey, B. J., Bodey, T. W., Votier, S. C., Bearhop,  
660 S., & Hamer, K. C. (2019). Using time-series similarity measures to compare animal  
661 movement trajectories in ecology. *Behavioral Ecology and Sociobiology*, 73(11), 1-19.
- 662 10. Coltuc, D., Datcu, M., & Coltuc, D. (2018). On the use of normalized compression  
663 distances for image similarity detection. *Entropy*, 20(2), 99. DOI:  
664 10.3390/e20020099
- 665 11. Dau, H.A., Keogh, E., Kamgar, K., Yeh, C.C.M., Zhu, Y., Gharghabi, S. ,  
666 Ratanamahatana, C.A., Chen, Y., Hu, B., Begum, N., Bagnall, A., Mueen, A., Batista,  
667 G., & Hexagon, M.L. (2019). *The UCR Time Series Classification Archive*. DOI:  
668 10.1109/JAS.2019.1911747 URL:  
669 [https://www.cs.ucr.edu/~eamonn/time\\_series\\_data\\_2018/](https://www.cs.ucr.edu/~eamonn/time_series_data_2018/)
- 670 12. Dornelas, M., Antao, L. H., Moyes, F., Bates, A. E., Magurran, A. E., Adam, D.,  
671 Akhmetzhanova, A.A., Appeltans, W., Arcos, J.M., Arnold, H., & Ayyappan, N.  
672 (2018). BioTIME: A database of biodiversity time series for the Anthropocene. *Global*  
673 *Ecology and Biogeography*, 27(7), 760-786. DOI: 10.1111/geb.12729
- 674 13. Drost, H.G. (2018). Philentropy: Information Theory and Distance Quantification  
675 with R. *Journal of Open Source Software*. DOI:10.21105/joss.00765

- 676 14. Edwards, M., Helaouet, P., Johns, D. G., Batten, S., Beaugrand, G., Chiba, S., Hall, J.,  
677 Head, E., Hosie, G., Kitchener, J., Koubbi, P., Kreiner, A., Melrose, C., Pinkerton, M.,  
678 Richardson, A.J., Robinson, K., Takahashi, K., Verheye, H.M., Ward, P. & Wootton,  
679 M. (2012). Global Marine Ecological Status Report: Results from the global CPR  
680 survey 2012/2013. *SAHFOS Technical Report 10*, 1-37. Plymouth, UK: SAFHOS.
- 681 15. Esling, P., & Agon, C. (2012). Time-series data mining. *ACM Computing Surveys*  
682 *(CSUR)*, 45(1), 1-34. DOI: 10.1145/2379776.2379788
- 683 16. Harris, S. J., Massimino, D., Balmer, D. E., Eaton, M. A., Noble, D. G., Pearce-  
684 Higgins, J.W., Woodcock, P. & Gillings, S. (2020). The Breeding Bird Survey  
685 2019. *BTO research report*, 726. British Trust for Ornithology, Thetford.
- 686 17. Hegg, J.C., & Kennedy, B.P. (2021). Let's do the time warp again: non-linear time  
687 series matching as a tool for sequentially structured data in ecology. *Ecosphere*,  
688 12(9), e03742. DOI: 10.1002/ecs2.3742
- 689 18. Jellesmark, S., Ausden, M., Blackburn, T. M., Gregory, R. D., Hoffmann, M.,  
690 Massimino, D., McRae, L. & Visconti, P. (2021). A counterfactual approach to  
691 measure the impact of wet grassland conservation on UK breeding bird  
692 populations. *Conservation Biology*. DOI: 10.1111/cobi.13692
- 693 19. Keogh, E., & Kasetty, S. (2003). On the need for time series data mining benchmarks:  
694 a survey and empirical demonstration. *Data Mining and knowledge discovery*, 7(4),  
695 349-371. DOI: 10.1023/A:1024988512476
- 696 20. Kocher, M., & Savoy, J. (2017). Distance measures in author profiling. *Information*  
697 *processing & management*, 53(5), 1103-1119. DOI: 10.1016/j.ipm.2017.04.004
- 698 21. Lhermitte, S., Verbesselt, J., Verstraeten, W. W., & Coppin, P. (2011). A comparison  
699 of time series similarity measures for classification and change detection of  
700 ecosystem dynamics. *Remote sensing of environment*, 115(12), 3129-3152. DOI:  
701 10.1016/j.rse.2011.06.020
- 702 22. Liao, T. W. (2005). Clustering of time series data—a survey. *Pattern*  
703 *recognition*, 38(11), 1857-1874. DOI: 10.1016/j.patcog.2005.01.025
- 704 23. Marques, A. R., Forde, H., & Revie, C. W. (2018). Time-series clustering of cage-level  
705 sea lice data. *PloS one*, 13(9), e0204319. DOI: 10.1371/journal.pone.0204319
- 706 24. McCune, B., Grace, J. B., & Urban, D. L. (2002). Distance measures. In *Analysis of*  
707 *Ecological Communities* (Vol. 28). Glenden Beach, OR: MjM software design, 45-57.
- 708 25. Montero, P., & Vilar, J. A. (2014). TSclust: An R package for time series  
709 clustering. *Journal of Statistical Software*, 62(1), 1-43. DOI: 10.18637/jss.v062.i01
- 710 26. Mori, U., Mendiburu, A., & Lozano, J. A. (2015). Similarity measure selection for  
711 clustering time series databases. *IEEE Transactions on Knowledge and Data*  
712 *Engineering*, 28(1), 181-195. DOI: 10.1109/TKDE.2015.2462369.

- 713 27. Mori, U., Mendiburu, A., & Lozano, J. A. (2016). Distance Measures for Time Series  
714 in R: The TSdist Package. *R J.*, 8(2), 451-459. [https://journal.r-](https://journal.r-project.org/archive/2016/RJ-2016-058/index.html)  
715 [project.org/archive/2016/RJ-2016-058/index.html](https://journal.r-project.org/archive/2016/RJ-2016-058/index.html)
- 716 28. Paparrizos, J., Liu, C., Elmore, A. J., & Franklin, M. J. (2020). Debunking four long-  
717 standing misconceptions of time-series distance measures. In *Proceedings of the*  
718 *2020 ACM SIGMOD International Conference on Management of Data* (pp. 1887-  
719 1905). DOI: 10.1145/3318464.3389760
- 720 29. Pardieck, K.L., Ziolkowski Jr., D.J., Lutmerding, M., Aponte, V.I., and Hudson, M-  
721 A.R. (2020). North American Breeding Bird Survey Dataset 1966 - 2019: *U.S.*  
722 *Geological Survey data release*, DOI: 10.5066/P9J6QUF6.
- 723 30. Potamitis, I., Rigakis, I., & Fysarakis, K. (2015). Insect biometrics: Optoacoustic  
724 signal processing and its applications to remote monitoring of McPhail type  
725 traps. *PloS one*, 10(11), e0140474. DOI: 10.1371/journal.pone.0140474
- 726 31. Pree, H., Herwig, B., Gruber, T., Sick, B., David, K., & Lukowicz, P. (2014). On  
727 general purpose time series similarity measures and their use as kernel functions in  
728 support vector machines. *Information Sciences*, 281, 478-495. DOI:  
729 10.1016/j.ins.2014.05.025
- 730 32. Priyadarshani, N., Marsland, S., Juodakis, J., Castro, I., & Listanti, V. (2020).  
731 Wavelet filters for automated recognition of birdsong in long-time field  
732 recordings. *Methods in Ecology and Evolution*, 11(3), 403-417. DOI: 10.1111/2041-  
733 210X.13357
- 734 33. Rakthanmanon, T., Campana, B., Mueen, A., Batista, G., Westover, B., Zhu, Q.,  
735 Zakaria, J., & Keogh, E. (2013). Addressing big data time series: Mining trillions of  
736 time series subsequences under dynamic time warping. *ACM Transactions on*  
737 *Knowledge Discovery from Data (TKDD)*, 7(3), 1-31. DOI: 10.1145/2500489
- 738 34. Teng, M. (2010). Anomaly detection on time series. In *2010 IEEE International*  
739 *Conference on Progress in Informatics and Computing 1*, 603-608. IEEE. DOI:  
740 10.1109/PIC.2010.5687485
- 741 35. van de Pol, M., Vindenes, Y., Sæther, B. E., Engen, S., Ens, B. J., Oosterbeek, K., &  
742 Tinbergen, J. M. (2011). Poor environmental tracking can make extinction risk  
743 insensitive to the colour of environmental noise. *Proceedings of the Royal Society B:*  
744 *Biological Sciences*, 278(1725), 3713-3722. DOI: 10.1098/rspb.2011.0487
- 745 36. Vasseur, D. A., & Yodzis, P. (2004). The color of environmental noise. *Ecology*, 85(4),  
746 1146-1152. DOI: 10.1890/02-3122
- 747 37. Wang, X., Mueen, A., Ding, H., Trajcevski, G., Scheuermann, P., & Keogh, E. (2013).  
748 Experimental comparison of representation methods and distance measures for time

- 749 series data. *Data Mining and Knowledge Discovery*, 26(2), 275-309. DOI:  
750 10.1007/s10618-012-0250-5
- 751 38. Weinshall, D., Jacobs, D. W., & Gdalyahu, Y. (1999). Classification in non-metric  
752 spaces. In *Advances in Neural Information Processing Systems* (pp. 838-846).
- 753 39. WWF (2020) Living Planet Report 2020 - Bending the curve of biodiversity loss.  
754 Almond, R.E.A., Grooten M. and Petersen, T. (Eds). WWF, Gland, Switzerland.
- 755 40. Zhu, Q., Batista, G., Rakthanmanon, T., & Keogh, E. (2012). A novel approximation to  
756 dynamic time warping allows anytime clustering of massive time series datasets.  
757 In *Proceedings of the 2012 SIAM international conference on data mining* (pp. 999-  
758 1010). Society for Industrial and Applied Mathematics. DOI:  
759 10.1137/1.9781611972825.86
